# Supplementary material for: Understanding of matrix embedding: a theoretical spectroscopic study of CO interacting with Ar clusters, surfaces and matrices
Source: Royal Society of Chemistry journal article supplement (doi:10.1039/c5cp01672j), 2015-01-01
Supplement: c5cp01672j1.pdf [file c5cp01672j1.pdf]

### Supplementary material:

We present the results of the computations of isolated H<sub>2</sub> and of H<sub>2</sub> embedded into an Ar matrix. We used similar methodology as described in the paper for CO@Ar<sub>n</sub>.

**Table S1:** variation of vibrational frequency of H<sub>2</sub> in argon matrix  $\omega_{H_2}$ .

| <b>Molecular system</b>              | <b><math>\omega_{H_2}</math> (cm<sup>-1</sup>)</b> | <b><math>\Delta\omega_{H_2}</math> (cm<sup>-1</sup>)</b> |
|--------------------------------------|----------------------------------------------------|----------------------------------------------------------|
| <b>H<sub>2</sub></b>                 | 4392.2                                             |                                                          |
|                                      | 4401.2 <sup>a)</sup>                               |                                                          |
| <b>H<sub>2</sub>@Ar<sub>31</sub></b> | 4248.0                                             | 144.2                                                    |
| <b>H<sub>2</sub>@Ar<sup>b)</sup></b> | 4241.6                                             | 159.6                                                    |

a) Ref. [80].

b) Ref. [83].

The spectroscopic properties of dihydrogen embedded in Ar matrix are following the same variations as those noticed for carbon monoxide. See text for more details.
